# Supplementary material for: Genetic dissection of cassava brown streak disease in a genomic selection population
Source: Front Plant Sci. 2023 Jan 13;13:1099409. doi: 10.3389/fpls.2022.1099409 (PMC9880483; doi:10.3389/fpls.2022.1099409)
Supplement: Supplementary file 4 [file Table_1.xlsx]

## Sheet: Supplemental Table 1 
Pairwise phenotypic (lower diagonal) and genetic (upper diagonal) correlations among CBSD traits in C2 population evaluated at Namulonge and Serere in 2019/2020 and 2020/2021 seasons
	A. Combined data
Traits	CBSDi3	CBSDi6	CBSDs3	CBSDs6	CBSDRi	CBSDRs
CBSDi3	-	1	1	1	0.9	0.93
CBSDi6	0.74	-	0.99	1	0.88	0.92
CBSDs3	0.92	0.7	-	1	0.93	1
CBSDs6	0.73	0.95	0.72	-	0.91	0.95
CBSDRi	0.46	0.37	0.47	0.39	-	0.94
CBSDRs	0.32	0.32	0.36	0.36	0.71	-
	B. Namulonge 2019
CBSDi3	-	1	1	0.99	0.75	0.82
CBSDi6	0.75	-	1	1	0.77	0.84
CBSDs3	0.92	0.72	-	1	0.79	0.99
CBSDs6	0.74	0.95	0.74	-	0.83	0.85
CBSDRi	0.36	0.3	0.41	0.35	-	0.88
CBSDRs	0.35	0.29	0.4	0.37	0.89	-
	C. Namulonge 2020
CBSDi3	-	1	0.99	0.99	-	1
CBSDi6	0.67	-	1	1	-	0.99
CBSDs3	0.94	0.62	-	1	-	0.98
CBSDs6	0.65	0.62	0.64	-	-	0.98
CBSDRi	-	-	-	-	-	-
CBSDRs	0.35	0.28	0.41	0.37	-	-
	D. Serere 2019
CBSDi3	-	0.99	1	1	0.95	0.94
CBSDi6	0.65	-	0.98	1	0.89	0.89
CBSDs3	0.94	0.64	-	0.99	0.96	1
CBSDs6	0.68	0.96	0.69	-	0.92	0.96
CBSDRi	0.27	0.25	0.27	0.29	-	0.92
CBSDRs	0.3	0.24	0.3	0.3	0.92	-
	E. Serere 2020
CBSDi3	-	1	0.99	1	0.95	0.89
CBSDi6	0.74	-	0.98	1	0.93	0.85
CBSDs3	0.92	0.69	-	0.98	0.98	0.94
CBSDs6	0.73	0.94	0.71	-	0.93	0.86
CBSDRi	0.5	0.41	0.47	0.4	-	0.99
CBSDRs	0.44	0.41	0.46	0.4	0.63	-
CBSDi3 = cassava brown streak foliar incidence at 3 months after planting (MAP); CBSDi6 = cassava brown streak foliar incidence at 6 MAP; CBSDs3 = cassava brown streak foliar severity at 3 MAP; CBSDs6 = cassava brown streak foliar severity at 3 MAP; CBSDRi = cassava brown streak root incidence; CBSDRs= cassava brown streak root severity.

## Sheet: Supplemental Table 2
Pairwise correlation of genomic breeding values among CBSD traits in C2 population evaluated at Namulonge and Serere in 2019/2020 (lower diagonal) and 2020/2021 (upper diagonal) seasons
	A. Combined data
Traits	CBSDi3	CBSDi6	CBSDs3	CBSDs6	CBSDRi	CBSDRs
CBSDi3	-
CBSDi6	0.85	-
CBSDs3	0.96	0.8	-
CBSDs6	0.84	0.96	0.84	-
CBSDRi	0.48	0.41	0.55	0.47	-
CBSDRs	0.31	0.26	0.42	0.36	0.83	-
	B. Namulonge
CBSDi3	-	0.84	0.95	0.82	-	0.29
CBSDi6	0.83	-	0.77	0.91	-	0.15
CBSDs3	0.93	0.71	-	0.82	-	0.47
CBSDs6	0.83	0.95	0.79	-	-	0.38
CBSDRi	0.18	0.1	0.39	0.28	-	-
CBSDRs	0.16	0.1	0.37	0.28	0.93	-
	C. Serere
CBSDi3	-	0.84	0.94	0.84	0.69	0.37
CBSDi6	0.82	-	0.81	0.96	0.67	0.46
CBSDs3	0.95	0.71	-	0.85	0.72	0.47
CBSDs6	0.82	0.97	0.76	-	0.69	0.46
CBSDRi	0.43	0.27	0.58	0.3	-	0.65
CBSDRs	0.35	0.19	0.48	0.23	0.94	-
CBSDi3 = cassava brown streak foliar incidence at 3 months after planting (MAP); CBSDi6 = cassava brown streak foliar incidence at 6 MAP; CBSDs3 = cassava brown streak foliar severity at 3 MAP; CBSDs6 = cassava brown streak foliar severity at 3 MAP; CBSDRi = cassava brown streak root incidence; CBSDRs= cassava brown streak root severity.

## Sheet: Supplemental Table 3
Candidate genes in the GWAS region of interest on chromosomes 13 and 18
	Gene name	Chromosome
1	MANES_13G011300	13
	MANES_13G011400	13
	MANES_13G011500	13
	MANES_13G011600	13
	MANES_13G011700	13
	MANES_18G137600	18
	MANES_18G137700	18
	MANES_18G137800	18
	MANES_18G137900	18
	MANES_18G138000	18
	MANES_18G138100	18
	MANES_18G138200	18
	MANES_18G138300	18
	MANES_18G138400	18
	MANES_18G138500	18
	MANES_18G138600	18
	MANES_18G138700	18
	MANES_18G138800	18
	MANES_18G138900	18
	MANES_18G139000	18
	MANES_18G139100	18
	MANES_18G139200	18
	MANES_18G139300	18
	MANES_18G139400	18
	MANES_18G139500	18
	MANES_18G139600	18
	MANES_18G139700	18
	MANES_18G139800	18
	MANES_18G139900	18
	MANES_18G140000	18
	MANES_18G140100	18
	MANES_18G140200	18
	MANES_18G140300	18
	MANES_18G140400	18
	MANES_18G140500	18
	MANES_18G140600	18
	MANES_18G140700	18
	MANES_18G140800	18
	MANES_18G140900	18
	MANES_18G141000	18
	MANES_18G141100	18
	MANES_18G141200	18
	MANES_18G141300	18
	MANES_18G141400	18
	MANES_18G141500	18
	MANES_18G141600	18
	MANES_18G141700	18
	MANES_18G141800	18
	MANES_18G141900	18
	MANES_18G142000	18
	MANES_18G142100	18
	MANES_18G142200	18
	MANES_18G142300	18
	MANES_18G142400	18
	MANES_18G142500	18
	MANES_18G142600	18
	MANES_18G142700	18
	MANES_18G142800	18
	MANES_18G143000	18
	MANES_18G143100	18
	MANES_18G143200	18
	MANES_18G143300	18
	MANES_18G143400	18
	MANES_18G143500	18
	MANES_18G143600	18
	MANES_18G143700	18
	MANES_18G143800	18
	MANES_18G143900	18
	MANES_18G144000	18
	MANES_18G144100	18
	MANES_18G144200	18
	MANES_18G144300	18
	MANES_18G144400	18
	MANES_18G144500	18
	MANES_18G144600	18
	MANES_18G144700	18
	MANES_18G144800	18

## Sheet: Supplemental Table 4
Pedigree of parents, grandparents, and great-grand parents of the C2 population
Parents of C2 population	Grand parents	Great grand parent1	Great grand parent2
UG15F069P004	UG110141	-	-
UG15F185P004	UG110154	-	-
UG15F118P030	UG120194	-	-
UG15F101P011	UG120148/ UG120160	UG110008/NASE14	UG110046
UG15F118P008	UG120194/NA	-	-
UG15F117P006	UG120190/NA	-	-
UG15F087P017	UG120160/NA	UG110046	-
UG15F291P001	UG120297/UG120303	TMEB14	UG110001/NASE14
UG15F100P004	UG120148/UG120300	UG110008/NASE14	TMEB14
UG15F088P002	UG120110/NA	UG110042
UG15F258P505	UG120190/NA	-	-
UG15F296P008	UG120300/UG120189	TMEB14	UG120189
UG15F119P001	UG120194/UG110043	-	-
UG15F100P014	UG120148/UG120300	UG110008/NASE14	TMEB14
UG15F042P003	UG110135/UG110140	-	-
UG15F304P001	UG130006/UG120071	UG110016/UG11007	UG110039
UG15F079P014	UG110142/NA	-	-
UG15F015P029	UG110044/UG110152	-	-
UG15F325P007	UG110149/NA	-	-
UG15F158P009	UG110144/NA	-	-
UG15F117P014	UG120190/NA	-	-
UG15F117P009	UG120190/NA	-	-
UG15F087P016	UG120160/NA	UG110046
UG15F226P024	UG120135/NA	UG110064/NASE14
UG15F118P018	UG120194/NA	-	-
UG15F117P012	UG120190/NA	-	-
UG15F118P017	UG120194/NA	-	-
UG15F096P002	UG120141/NA	-	-
UG15F168P009	UG110146/NA	-	-
UG15F156P009	UG110143/NA	-	-
UG15F087P006	UG120160/NA	UG110046	-
UG15F276P001	UG120198/NA	-	-
UG15F218P501	UG120085/UG120165	UG110040	NASE14
UG15F028P003	UG130030/UG120197	-	-
UG15F118P011	UG120194/NA	-	-
UG15F196P003	UG110156/NA	-	-
UG15F203P006	UG120022/UG120289	UG110043/NASE14	UG110006/UG110001
UG15F031P001	UG110033/NA	-	-
UG15F143P001	UG120085/UG120165	UG110040	NASE14
UG15F196P007	UG110156/NA	-	-
UG15F025P012	UG110139/NA	-	-
UG15F306P011	UG130010/NA	UG110039
UG15F031P021	UG110033/NA	-	-
UG15F289P006	UG120297/NA	TMEB14	-
UG15F306P018	UG130010/NA	UG110039	-
UG15F226P031	UG120135/NA	UG110064/NASE14	-
UG15F276P014	UG120198/NA	-	-
UG15F155P005	NA/NA	-	-
UG15F056P001	UG110136/UG110137	-	-
UG15F156P518	UG110143/NA	-	-
UG15F193P010	UG110155/NA	-	-
UG15F127P004	UG120248/NA	UG110040	-
UG15F178P009	UG110243/NA	-	-
UG15F158P012	UG110144/NA	-	-
UG15306P032	NA/NA	-	-
UG15F276P015	UG120198/NA	-	-
UG15F239P017	UG120153/NA	-	-
UG15F258P004	UG120190/NA	-	-
UG15F306P034	UG130010/NA	UG110039	-
UG15F276P008	UG120198/NA	-	-
UG15F306P016	UG130010/NA	UG110039	-
UG15F226P018	UG120135/NA	-	-
UG15F279P001	UG120135/NA	UG110064/NASE14	-
UG15F163P002	UG110039/UG110145	-	-
UG15F306P005	UG130010/NA	UG110039	-
UG15F074P001	UG110043/UG120024	UG110043/NASE14	UG110043
UG15F061P006	UG110210/NA	-	-
UG15F322P001	UG110148/NA	-	-
UG15F306P006	UG130010/NA	UG110039	-
UG15F203P005	UG120022/UG120289	UG110043/NASE14	UG110006/UG110001
UG15F118P016	UG120194/NA	-	-
UG15F069P006	UG110141/UG110141	-	-
UG15F239P016	UG120153/NA	-	-
UG15F278P001	UG120198/UG110158	-	-
UG15F111P011	UG120181/NA	-	-
UG15F047P004	UG110151/UG110152	-	-
UG15F251P006	UG120187/NA	-	-
UG15F025P004	UG110139/NA	-	-
UG15F326P001	UG110149/UG110150	-	-
UG15F020P001	UG130099/UG110039	-	-
UG15F196P006	UG110156/NA	-	-
UG15F196P010	UG110156/NA	-	-
UG15F196P020	UG110156/NA	-	-
UG15F120P003	UG120205/NA	UG110008	-
UG15F088P003	UG120110/NA	UG110042	-
UG15F088P005	UG120110/NA	UG110042	-
UG15F117P001	UG120190/NA	-	-
UG15F237P003	UG120148/UG120300	UG110008/NASE14	TMEB14
UG15F087P001	UG120160/NA	UG110046	-
UG15F258P002	UG120190/NA	-	-
UG15F118P023	UG120194/NA	-	-
UG15F235P007	UG120148/UG120160	UG110008/NASE14	UG110046
UG15F250P006	UG120183/UG120043	UG110003/UG110005	58308/BRANCA DE SANTA CATARINA
UG15F088P006	UG120110/NA	UG110042	-
UG15F087P007	UG120160/NA	UG110046	-
UG15F117P509	UG120190/NA	-	-
UG15F236P006	UG120148/UG120208	UG110008/NASE14	-
UG15F168P002	UG110146/NA	-	-
UG15F101P003	UG120148/UG120160	UG110008/NASE14	UG110046
UG15F210P004	UG120045/NA	UG110008/NASE14	-
UG15F190P502	UG110157/NA	-	-
UG15F087P505	UG120160/NA	UG110046	-
UG15F233P011	UG120148/NA	UG110008/NASE14	-
UG15F271P008	UG120193/UG130123	-	UG110047
UG15F117P005	UG120190/NA	-	-
UG15F088P009	UG120110/NA	UG110042	-
UG15F258P003	UG120190/NA	-	-
UG15F116P007	UG120189/NA	-	-
